# Supplementary material
Source: PubMed Central journal article supplement (PMC5153978)
Supplement: JVIM-30-1270-s001.pdf [file JVIM-30-1270-s001.pdf]

**Table 1a. Questionnaire variables and their proportions for descriptive purposes.**

Cases = EGGD present (horses with pure EGGD and horses with EGGD and ESGD); controls = healthy horses and horses with ESGD without EGGD; n= number of responses for each variable; CI = confidence interval.

| No       | Variable                    | Cases |                  | Controls |                   |
|----------|-----------------------------|-------|------------------|----------|-------------------|
|          |                             | n     | % (95% CI)       | n        | % (95% CI)        |
| <b>1</b> | Age (years)                 | 83    |                  | 34       |                   |
|          | 1-3                         | 1     | 1.2 (0.1-05.5)   | 1        | 2.9 (0.3-12.9)    |
|          | 4-6                         | 18    | 21.7 (13.9-31.4) | 6        | 17.6 (7.7-32.8)   |
|          | 7-10                        | 32    | 38.6 (28.6-49.3) | 13       | 38.2 (23.4- 55.0) |
|          | 11-15                       | 20    | 24.1 (15.9-34.1) | 10       | 29.4 (16.2-45.9)  |
|          | 16-20                       | 10    | 12.0 (6.4-20.3)  | 2        | 5.9 (1.2-17.6)    |
|          | 21-25                       | 2     | 2.4 (0.5-7.5)    | 2        | 5.9 (1.2-17.6)    |
| <b>2</b> | Breed                       | 82    |                  | 34       |                   |
|          | Icelandic horse             | 1     | 1.2 (0.1-5.6)    | 1        | 2.9 (0.3- 12.9)   |
|          | Standardbred                | 4     | 4.9 (1.7-11.2)   | 3        | 8.8 (2.5-21.7)    |
|          | Other breed                 | 5     | 6.1 (2.4-12.8)   | 5        | 14.7 (5.8-29.3)   |
|          | Pony                        | 3     | 3.7 (0.1-9.4)    | 7        | 20.6 (9.7-36.2)   |
|          | Warmblood                   | 52    | 63.4 (52.7-73.2) | 15       | 44.1 (28.5-60.7)  |
|          | Finnhorse                   | 17    | 20.7 (13.1-30.4) | 3        | 8.8 (2.5-21.7)    |
| <b>3</b> | Sex                         | 83    |                  | 34       |                   |
|          | Male                        | 47    | 56.6 (45.9-66.9) | 21       | 61.8 (45.0-76.6)  |
|          | Female                      | 36    | 43.4 (33.1-54.1) | 13       | 38.2 (23.4-55.0)  |
| <b>4</b> | Forage location             | 83    |                  | 34       |                   |
|          | Ground                      | 66    | 79.5 (69.9-87.1) | 27       | 79.4 (63.8-90.3)  |
|          | Bucket                      | 10    | 15.2 (6.4-20.3)  | 3        | 8.8 (2.5-21.7)    |
|          | Haynet                      | 7     | 8.4 (3.9-15.8)   | 4        | 11.8 (1.4-25.6)   |
| <b>5</b> | Eating habits               | 83    |                  | 34       |                   |
|          | With other horses           | 22    | 26.5 (17.9-36.7) | 7        | 20.6 (9.7-36.2)   |
|          | Alone                       | 55    | 66.3 (55.7-75.7) | 24       | 70.6 (54.1-83.8)  |
|          | Other                       | 6     | 7.2 (3.1-14.3)   | 3        | 8.8 (2.5-21.7)    |
| <b>6</b> | Water source at the stable  | 83    |                  | 34       |                   |
|          | Ground well                 | 45    | 54.2 (43.5-64.6) | 18       | 52.9 (36.5-68.9)  |
|          | Communal                    | 37    | 44.6 (34.2-55.3) | 16       | 47.1 (31.1-63.5)  |
| <b>7</b> | Water source at the paddock | 78    |                  | 34       |                   |
|          | Ground well                 | 40    | 51.3 (40.3-62.2) | 19       | 55.9 (39.3-71.5)  |
|          | Communal                    | 34    | 43.6 (33.0-54.7) | 12       | 38.2 (23.4-55.0)  |
|          | Other                       | 4     | 5.1 (1.8-11.7)   | 2        | 5.9 (1.2-17.6)    |

|           |                                |    |                  |    |                  |
|-----------|--------------------------------|----|------------------|----|------------------|
| <b>8</b>  | Water                          | 83 |                  | 34 |                  |
|           | From a bucket                  | 63 | 75.9 (65.9-84.1) | 24 | 70.6 (54.1-83.8) |
|           | From an automat                | 20 | 24.1 (15.9-34.1) | 10 | 29.4 (16.2-45.9) |
| <b>9</b>  | Living location                | 83 |                  | 34 |                  |
|           | Loose housing system           | 5  | 6.0 (2.3-12.7)   | 2  | 5.9 (1.2-17.6)   |
|           | Stable                         | 77 | 92.8 (85.7-96.9) | 32 | 94.1 (82.4-98.8) |
|           | Other                          | 1  | 1.2 (0.1-5.6)    | 0  | 0.0 (0.0-7.1)    |
| <b>10</b> | Stable cleaning freq.          | 82 |                  | 34 |                  |
|           | Once a day                     | 54 | 65.9 (55.2-75.4) | 30 | 88.2 (74.4-95.9) |
|           | Twice a day                    | 24 | 29.3 (20.3-39.7) | 4  | 11.8 (4.1-25.6)  |
|           | 3 times a day                  | 1  | 1.2 (0.1-5.6)    | 0  | 0.0 (0.0-7.1)    |
|           | Less than once a day           | 3  | 3.7(1.0-9.4)     | 0  | 0.0 (0.0-7.1)    |
| <b>11</b> | Bedding material               | 83 |                  | 34 |                  |
|           | Other                          | 4  | 4.8 (1.6-11.1)   | 2  | 5.9 (1.2-17.6)   |
|           | Peat                           | 39 | 47.0 (36.5-57.7) | 16 | 47.1 (31.1-63.5) |
|           | Shavings                       | 20 | 24.1 (15.9-34.1) | 6  | 17.6 (7.7-32.8)  |
|           | Straw/straw pellets            | 18 | 21.7 (13.9-31.4) | 10 | 29.4 (16.2-45.9) |
|           | Woodchips                      | 1  | 1.2 (0.1-5.5)    | 0  | 0.0 (0.0-7.1)    |
|           | Other                          | 1  | 1.2 (0.1-5.5)    | 0  | 0.0 (0.0-7.1)    |
| <b>12</b> | No of horses in the stable     | 82 |                  | 33 |                  |
|           | 15                             | 20 | 24.4 (16.1-34.5) | 9  | 27.3 (14.4-43.9) |
|           | 21                             | 31 | 37.8 (27.9-48.6) | 6  | 18.2 (8.0-33.7)  |
|           | 3                              | 12 | 14.6 (8.3-23.5)  | 7  | 21.2 (10.0-37.2) |
|           | 7                              | 19 | 23.2 (15.1-33.1) | 11 | 33.3 (19.2-50.3) |
|           | No other horses                | 1  | 1.2 (0.1-5.6)    | 1  | 3.0 (0.3-13.3)   |
| <b>13</b> | No of caretakers               | 83 |                  | 34 |                  |
|           | 1                              | 14 | 16.9 (10.0-26.0) | 5  | 14.7 (5.8-29.3)  |
|           | 2                              | 29 | 34.9 (25.3-45.6) | 13 | 38.2 (23.4-55.0) |
|           | 3                              | 23 | 27.7 (19.0-38.0) | 10 | 29.4 (16.2-45.9) |
|           | 4                              | 11 | 13.3 (7.3-21.8)  | 2  | 5.9 (1.2-17.6)   |
| <b>14</b> | No of owners (horse's history) | 77 |                  | 30 |                  |
|           | 1                              | 14 | 18.2 (10.8-27.9) | 5  | 16.7 (6.7-32.7)  |
|           | 2                              | 29 | 37.7 (27.5-48.8) | 13 | 43.3 (26.9-61.0) |
|           | 3                              | 23 | 29.9 (20.5-40.7) | 10 | 33.3 (18.6-51.1) |
|           | 4                              | 11 | 14.3 (7.8-23.4)  | 2  | 6.7 (1.4-19.7)   |
| <b>15</b> | Contact with other stables     | 82 |                  | 33 |                  |
|           | No                             | 67 | 81.7 (72.3-88.9) | 29 | 87.9 (73.7-95.8) |
|           | Yes                            | 15 | 18.3 (11.1-27.7) | 4  | 12.1 (4.2-26.3)  |

|           |                                   |    |                  |    |                  |
|-----------|-----------------------------------|----|------------------|----|------------------|
| <b>16</b> | Stable change                     | 82 |                  | 33 |                  |
|           | No                                | 40 | 48.8 (38.2-59.5) | 15 | 45.5 (29.4-62.2) |
|           | Yes                               | 42 | 51.2 (40.5-61.8) | 18 | 54.5 (37.8-70.6) |
| <b>17</b> | Traveling abroad                  | 83 |                  | 33 |                  |
|           | No                                | 75 | 90.4 (82.6-95.3) | 30 | 90.9 (77.7-97.4) |
|           | Yes                               | 8  | 9.6 (4.7-17.4)   | 3  | 9.1 (2.6-22.3)   |
| <b>18</b> | Transporting frequency            | 83 |                  | 34 |                  |
|           | Very seldom                       | 17 | 20.5 (12.9-30.1) | 9  | 26.5 (14.0-42.8) |
|           | Less than once/month              | 27 | 32.5 (23.2-43.1) | 13 | 38.2 (23.4-55.0) |
|           | Once/month                        | 32 | 38.6 (28.6-49.3) | 9  | 26.5 (14.0-42.8) |
|           | Once/week                         | 7  | 8.4 (3.9-15.8)   | 3  | 8.8 (2.5-21.7)   |
| <b>19</b> | Time spent outdoors at one time/h | 75 |                  | 34 |                  |
|           | 2                                 | 3  | 4.0 (1.1-10.3)   | 0  | 0.0 (0.0-7.1)    |
|           | 4                                 | 27 | 36.0 (25.8-47.2) | 9  | 26.5 (14.0-42.8) |
|           | 6                                 | 48 | 64.0 (52.8-74.2) | 22 | 64.7 (48.0-79.1) |
|           | free access                       | 5  | 6.7 (2.4-14.0)   | 3  | 8.8 (2.5-21.7)   |
| <b>20</b> | Sand paddock                      | 83 |                  | 34 |                  |
|           | No                                | 66 | 79.5 (69.9-87.1) | 24 | 70.6 (54.1-83.8) |
|           | Yes                               | 17 | 20.5 (12.9-30.1) | 10 | 29.4 (16.2-45.9) |
| <b>21</b> | Grass paddock                     | 83 |                  | 34 |                  |
|           | No                                | 66 | 79.5 (69.9-87.1) | 25 | 73.5 (57.2-86.0) |
|           | Yes                               | 17 | 20.5 (12.9-30.1) | 9  | 26.5 (14.0-42.8) |
| <b>22</b> | Access to pasture                 | 83 |                  | 34 |                  |
|           | No                                | 16 | 19.3 (11.9-28.7) | 3  | 8.8 (2.5-21.7)   |
|           | Yes                               | 67 | 80.7 (71.3-88.1) | 31 | 91.2 (78.3-97.5) |
| <b>23</b> | Other paddock type                | 83 |                  | 34 |                  |
|           | No                                | 7  | 8.4 (3.9-15.8)   | 3  | 8.8 (2.5-21.7)   |
|           | Yes                               | 76 | 91.6 (84.2-96.1) | 32 | 91.2 (78.3-97.5) |
| <b>24</b> | On paddock                        | 82 |                  | 34 |                  |
|           | With many other horses            | 23 | 28.0 (19.2-38.4) | 7  | 20.6 (9.7-36.2)  |
|           | With one other horse              | 24 | 29.3 (20.3-39.7) | 9  | 26.5 (14.0-42.8) |
|           | Alone                             | 35 | 42.7 (32.4-53.5) | 18 | 52.9 (36.5-68.9) |
| <b>25</b> | Summer pasture                    | 82 |                  | 34 |                  |
|           | No                                | 16 | 19.5 (12.1-29.1) | 6  | 17.6 (7.7-32.8)  |
|           | Yes                               | 66 | 80.5 (70.9-87.9) | 28 | 82.4 (67.2-92.3) |
| <b>26</b> | Time at pasture/months            | 70 |                  | 28 |                  |
|           | 0.5                               | 12 | 17.1 (9.7-27.2)  | 3  | 10.7 (3.1-25.9)  |

|           |                             |    |                  |    |                  |
|-----------|-----------------------------|----|------------------|----|------------------|
|           | 1                           | 8  | 11.4 (5.6-20.4)  | 3  | 10.7 (3.1-25.9)  |
|           | 2                           | 14 | 20.0 (12.0-30.5) | 5  | 17.9 (7.2-34.8)  |
|           | 3                           | 25 | 35.7 (25.2-47.3) | 11 | 39.3 (23.0-57.7) |
|           | 4                           | 11 | 15.7 (8.6-25.5)  | 5  | 17.9 (7.2-34.8)  |
|           | 5                           | 0  | 0.0 (0.0-3.5)    | 1  | 3.6 (0.4-15.5)   |
| <b>27</b> | Trained while on pasture    | 69 |                  | 27 |                  |
|           | No                          | 13 | 18.8 (11.0-29.2) | 7  | 25.9 (12.4-44.3) |
|           | Yes                         | 56 | 81.2 (70.8-89.0) | 20 | 74.1 (55.7-87.6) |
| <b>28</b> | Actively competing          | 83 |                  | 34 |                  |
|           | No                          | 43 | 51.8 (41.2-62.3) | 22 | 64.7 (87.1-99.7) |
|           | Yes                         | 40 | 48.2 (37.7-58.8) | 12 | 35.3 (20.9-52.0) |
| <b>29</b> | Discipline                  | 50 |                  | 15 |                  |
|           | Showjumping                 | 20 | 40.0 (27.3-53.8) | 6  | 40.0 (18.8-64.7) |
|           | Dressage                    | 20 | 40.0 (27.3-53.8) | 6  | 40.0 (18.8-64.7) |
|           | Trotting                    | 8  | 16.0 (7.9-27.9)  | 1  | 6.7 (0.7-27.2)   |
|           | Icelandic horse gaited test | 1  | 2.0 (0.2-9.0)    | 0  | 0.0 (0.0-15.2)   |
|           | Eventing                    | 1  | 2.0 (0.2-9.0)    | 2  | 13.3 (2.9-36.3)  |
| <b>30</b> | Use at riding school        | 82 |                  | 34 |                  |
|           | No                          | 75 | 91.5 (84.1-96.1) | 33 | 97.1(87.1-99.7)  |
|           | Yes                         | 7  | 8.5 (3.9-16.0)   | 1  | 2.9 (0.3-12.9)   |
| <b>31</b> | No of riders                | 77 |                  | 30 |                  |
|           | 1                           | 23 | 29.9 (20.5-40.7) | 14 | 46.7 (29.8-64.1) |
|           | 2                           | 32 | 41.6 (31.0-52.7) | 13 | 43.3 (26.9-61.0) |
|           | 3                           | 17 | 22.1 (13.9-32.3) | 3  | 10.0 (2.4-24.3)  |
|           | 4                           | 2  | 2.6 (0.5-8.1)    | 0  | 0.0 (0.0-8.0)    |
|           | 5                           | 3  | 3.9 (1.1-10.0)   | 0  | 0.0 (0.0-8.0)    |
| <b>32</b> | Previous diagnosis of EGUS  | 71 |                  | 31 |                  |
|           | No                          | 37 | 52.1 (40.6-63.5) | 18 | 58.1(40.6-74.1)  |
|           | Yes                         | 34 | 47.9 (36.5-59.4) | 13 | 41.9(25.9-59.4)  |
| <b>33</b> | Recurrent EGUS              | 68 |                  | 28 |                  |
|           | No                          | 56 | 82.3 (72.0-90.0) | 27 | 96.4 (84.5-99.6) |
|           | Yes                         | 12 | 17.6 (10.0-28.0) | 1  | 3.6 (0.4-15.5)   |
| <b>34</b> | Sand enteropathy            | 72 |                  | 30 |                  |
|           | No                          | 52 | 72.2 (61.2-81.5) | 19 | 63.3 (45.5-78.7) |
|           | Yes                         | 20 | 27.8 (18.5-38.8) | 11 | 36.7 (21.3-54.5) |
| <b>35</b> | Weight loss                 | 72 |                  | 31 |                  |
|           | No                          | 39 | 54.2 (42.7-65.3) | 16 | 51.6 (34.5-68.4) |
|           | Yes                         | 33 | 45.8 (34.7-57.3) | 15 | 48.4 (31.6-65.5) |
| <b>36</b> | Colic                       | 76 |                  | 32 |                  |
|           | No                          | 47 | 61.8 (50.6-72.2) | 14 | 43.8 (27.7-60.9) |
|           | Yes                         | 29 | 38.2 (27.8-49.4) | 18 | 56.3 (39.1-72.3) |

|           |                                               |    |                  |    |                  |
|-----------|-----------------------------------------------|----|------------------|----|------------------|
| <b>37</b> | Diarrhoea                                     | 72 |                  | 32 |                  |
|           | No                                            | 41 | 56.9 (45.4-67.9) | 18 | 56.3 (39.1-72.3) |
|           | Yes                                           | 31 | 43.1 (32.1-54.6) | 14 | 43.8 (27.7-60.9) |
| <b>38</b> | Positive FEC                                  | 71 |                  | 31 |                  |
|           | No                                            | 62 | 87.3 (75.1-91.6) | 26 | 83.9 (68.2-93.6) |
|           | Yes                                           | 9  | 12.7 (6.4-21.6)  | 5  | 16.1 (6.4-31.8)  |
| <b>39</b> | Deworming freq.                               | 81 |                  | 34 |                  |
|           | Less often than twice/year                    | 5  | 6.2 (2.4-13.0)   | 3  | 8.8 (2.5-21.7)   |
|           | Twice/year                                    | 53 | 65.4 (54.7-75.1) | 19 | 55.9 (39.3-71.5) |
|           | 4 times/year                                  | 21 | 25.9 (17.3-36.2) | 11 | 32.4 (18.6-49.0) |
|           | More often than 4 times/year                  | 1  | 1.2 (0.1-5.6)    | 0  | 0.0 (0.0-7.1)    |
|           | No deworming                                  | 1  | 1.2 (0.1-5.7)    | 1  | 2.9 (0.3-12.9)   |
| <b>40</b> | Use of antihelminthics                        | 83 |                  | 34 |                  |
|           | No                                            | 19 | 22.9 (14.9-32.8) | 8  | 23.5 (11.8-39.5) |
|           | Yes                                           | 64 | 77.1 (67.2-85.1) | 26 | 76.5 (60.5-88.2) |
| <b>41</b> | EHV vaccination                               | 49 |                  | 21 |                  |
|           | No                                            | 31 | 63.3 (43.9-75.7) | 12 | 57.1 (36.2-76.3) |
|           | Yes                                           | 18 | 36.7 (24.3-50.7) | 9  | 42.9 (23.7-63.8) |
| <b>42</b> | Rabies vaccination                            | 47 |                  | 18 | 18               |
|           | No                                            | 34 | 72.3 (58.5-83.5) | 12 | 66.7 (43.7-84.7) |
|           | Yes                                           | 13 | 27.7 (16.5-41.5) | 6  | 33.3 (15.3-56.3) |
| <b>43</b> | Botulism vaccination                          | 40 |                  | 17 |                  |
|           | No                                            | 37 | 92.5 (83.1-97.8) | 14 | 82.4 (60.0-94.8) |
|           | Yes                                           | 3  | 7.5 (2.2-18.7)   | 3  | 17.6 (5.2-40.0)  |
| <b>44</b> | Use of NSAIDs                                 | 83 |                  | 34 |                  |
|           | No                                            | 52 | 62.7 (52.0-72.5) | 22 | 64.7 (87.1-99.7) |
|           | Yes                                           | 31 | 37.3 (27.5-48.0) | 12 | 35.3 (20.9-52.0) |
| <b>45</b> | Use of neutraceuticals for prevention of EGUS | 79 |                  | 30 |                  |
|           | No                                            | 61 | 77.2 (67.1-85.4) | 23 | 76.7 (59.6-88.9) |
|           | Yes                                           | 18 | 22.8 (14.6-32.9) | 7  | 23.3 (11.1-40.4) |
| <b>46</b> | Hay type                                      | 83 |                  | 34 |                  |
|           | Hay                                           | 39 | 47.0 (36.5-57.7) | 10 | 29.4 (16.2-45.9) |
|           | Haylage                                       | 20 | 24.1 (15.9-34.1) | 11 | 32.4 (18.6-49.0) |
|           | Hay & haylage                                 | 24 | 28.9 (20.0-39.3) | 13 | 38.2 (23.4-55.0) |
| <b>47</b> | Hay amount kg/d                               | 64 |                  | 27 |                  |
|           | 5-7                                           | 5  | 7.8 (3.0-16.3)   | 7  | 25.9 (12.4-44.3) |
|           | 8-10                                          | 12 | 18.8 (10.7-29.6) | 4  | 14.8 (5.2-31.5)  |
|           | 10-12                                         | 30 | 46.9 (35.0-59.0) | 7  | 41.2 (12.4-44.3) |
|           | >12                                           | 17 | 26.6 (16.9-38.2) | 9  | 52.9 (17.9-52.1) |
| <b>48</b> | Concentrate amount                            | 56 |                  | 20 |                  |

| l/vrk                 |           |                  |           |                  |
|-----------------------|-----------|------------------|-----------|------------------|
| 0.2-0.9               | 7         | 12.5 (5.8-23.0)  | 4         | 20.0 (7.2-40.8)  |
| 1.0-1.5               | 9         | 16.1 (8.3-27.3)  | 4         | 20.0 (7.2-40.8)  |
| 1.6-2.0               | 10        | 17.9 (9.6-29.4)  | 6         | 30.0 (13.6-51.7) |
| 2.1-2.5               | 2         | 3.6 (0.7-11.0)   | 0         | 0.0 (0.0-0.117)  |
| 2.6-3.0               | 7         | 12.5 (5.8-23.0)  | 2         | 10.0 (2.1-28.4)  |
| 3.1-3.5               | 1         | 1.8 (0.2-8.0)    | 0         | 0.0 (0.0-0.117)  |
| 3.6-4.0               | 7         | 12.5 (5.8-23.0)  | 1         | 5.0 (0.5-21.1)   |
| 4.1-4.5               | 5         | 8.9 (3.5-18.5)   | 2         | 10.0 (2.1-28.4)  |
| 4.6-5.0               | 3         | 5.4 (1.5-13.6)   | 1         | 15.0 (4.4-34.9)  |
| > 5.0                 | 5         | 8.9 (3.5-18.5)   | 0         | 0.0 (0.0-0.117)  |
| <b>49</b> Gastroscopy | <b>83</b> |                  | <b>34</b> |                  |
| Hospitalized          | 17        | 20.0 (20.0-39.3) | 14        | 41.2 (25.9-57.9) |
| Outpatient            | 66        | 60.7 (60.7-80.0) | 20        | 58.8 (42.1-74.1) |
