# Supplementary material
Source: PubMed Central journal article supplement (PMC5153978)
Supplement: JVIM-30-1270-s002.pdf [file JVIM-30-1270-s002.pdf]

**Table 2a. Questionnaire variables and their proportions, subset of data.**

Cases= pure EGGD; controls= healthy horses; n= number of responses for each variable; CI = confidence interval.

| N<br>o   | Variable                   | Cases |                  | Controls |                  |
|----------|----------------------------|-------|------------------|----------|------------------|
|          |                            | n     | % (95% CI)       | n        | % (95% CI)       |
| <b>1</b> | Age (years)                | 43    |                  | 22       |                  |
|          | 1-3                        | 1     | 2.3 (0.3-10.4)   | 1        | 4.5 (0.5-19.3)   |
|          | 4-6                        | 8     | 18.6 (9.2-32.1)  | 2        | 9.1 (1.9-26.1)   |
|          | 7-10                       | 14    | 32.6 (20.0-47.3) | 7        | 31.8 (15.5-52.6) |
|          | 11-15                      | 11    | 25.6 (14.4-39.9) | 8        | 36.4 (18.9-57.1) |
|          | 16-20                      | 7     | 16.3 (7.6-29.3)  | 2        | 9.1 (1.9-26.1)   |
|          | 21-25                      | 2     | 4.7 (0.1-14.1)   | 2        | 9.1 (1.9-26.1)   |
| <b>2</b> | Breed                      | 43    |                  | 22       |                  |
|          | Icelandic horse            | 1     | 2.3 (0.3-10.4)   | 1        | 4.5 (0.5-19.3)   |
|          | Standardbred               | 1     | 2.3 (0.3-10.4)   | 0        | 0.0 (0.0-10.7)   |
|          | Other breed                | 2     | 4.7 (1.0-14.1)   | 4        | 18.2 (6.5-37.6)  |
|          | Pony                       | 0     | 0.0 (0.0-5.6)    | 6        | 27.3 (12.3-47.8) |
|          | Warmblood                  | 31    | 72.1 (57.6-83.7) | 9        | 40.9 (22.5-61.5) |
|          | Finnhorse                  | 8     | 18.6 (9.2-32.1)  | 2        | 9.1 (1.9-26.1)   |
| <b>3</b> | Sex                        | 43    |                  | 22       |                  |
|          | Male                       | 25    | 58.1 (43.3-72.0) | 15       | 68.2 (47.4-84.5) |
|          | Female                     | 18    | 41.9 (28.0-56.7) | 17       | 31.8 (15.5-52.6) |
| <b>4</b> | Forage location            | 43    |                  | 22       |                  |
|          | Ground                     | 5     | 11.6 (4.6-23.6)  | 1        | 4.5 (0.5-19.3)   |
|          | Bucket                     | 36    | 83.7 (70.7-92.4) | 19       | 86.4 (67.9-96.0) |
|          | Haynet                     | 2     | 4.7 (0.1-14.1)   | 2        | 9.1 (1.9-26.1)   |
| <b>5</b> | Eating habits              | 43    |                  | 22       |                  |
|          | With other horses          | 11    | 25.6 (14.4-39.9) | 3        | 13.6 (4.0-32.1)  |
|          | Alone                      | 29    | 67.4 (52.7-80.0) | 18       | 81.8 (62.4-93.5) |
|          | Other                      | 3     | 7.0 (2.0-17.5)   | 1        | 4.5 (0.5-19.3)   |
| <b>6</b> | Water source at the stable | 42    |                  | 22       |                  |
|          | Ground well                | 24    | 57.1(42.1-71.2)  | 11       | 50.0 (30.2-69.8) |

|           |                             |    |                  |    |                  |
|-----------|-----------------------------|----|------------------|----|------------------|
|           | Communal                    | 18 | 42.9 (28.8-57.9) | 11 | 50.0 (30.2-69.8) |
| <b>7</b>  | Water source at the paddock | 40 |                  | 21 |                  |
|           | Ground well                 | 21 | 52.5 (37.3-67.3) | 12 | 57.1(36.2-76.3)  |
|           | Communal                    | 17 | 42.5 (28.1-57.9) | 7  | 33.3 (16.3-54.6) |
|           | Other                       | 2  | 5.0 (1.1-15.1)   | 2  | 0.1 (0.0-11.1)   |
| <b>8</b>  | Water                       | 43 |                  | 22 |                  |
|           | From a bucket               | 10 | 23.3(12.6-37.3)  | 6  | 27.3 (12.3-47.8) |
|           | From an automat             | 33 | 76.7 (62.7-87.4) | 16 | 72.7 (52.2-87.7) |
| <b>9</b>  | Living location             | 43 |                  | 22 |                  |
|           | Loose housing system        | 3  | 7.0 (2.0-17.5)   | 2  | 9.1 (1.9-26.1)   |
|           | Stable                      | 39 | 90.7 (79.4-96.8) | 20 | 90.9 (73.9-98.1) |
|           | Other                       | 1  | 2.3 (0.3-10.4)   | 0  | 0.0 (0.0-10.7)   |
| <b>10</b> | Stable cleaning freq.       | 42 |                  | 22 |                  |
|           | Once a day                  | 28 | 66.7 (51.7-79.4) | 19 | 86.4 (67.9-96.0) |
|           | Twice a day                 | 13 | 31.0 (18.6-45.8) | 3  | 13.6 (4.0-32.1)  |
|           | Less than once a day        | 1  | 2.4 (0.3-10.6)   | 0  | 0.0 (0.0-10.7)   |
| <b>11</b> | Bedding material            | 43 |                  | 22 |                  |
|           | Other                       | 2  | 4.7 (1.0-14.1)   | 1  | 4.5 (0.5-19.3)   |
|           | Peat                        | 25 | 58.1 (43.3-72.0) | 12 | 54.5 (34.3-73.7) |
|           | Shavings                    | 5  | 11.6 (4.6-23.6)  | 5  | 22.7 (9.2-42.9)  |
|           | Straw/straw pellets         | 10 | 23.3 (12.6-37.3) | 4  | 18.2 (6.5-37.6)  |
|           | Woodchips                   | 1  | 2.3 (0.3-10.4)   | 0  | 0.0 (0.0-10.7)   |
| <b>12</b> | No of horses in the stable  | 43 |                  | 22 |                  |
|           | 15                          | 10 | 23.3 (12.6-37.3) | 8  | 36.4 (18.9-57.1) |
|           | 21                          | 19 | 44.2 (30.1-59.0) | 4  | 18.2 (6.5-37.6)  |
|           | 3                           | 5  | 11.6 (4.6-23.6)  | 4  | 18.2 (6.5-37.6)  |
|           | 7                           | 9  | 20.9 (10.9-34.7) | 6  | 27.3 (12.3-47.8) |
| <b>13</b> | No of caretakers            | 43 |                  | 22 |                  |
|           | 1                           | 1  | 2.3 (0.3-10.4)   | 1  | 4.5 (0.5-19.3)   |
|           | 2                           | 14 | 32.6 (20.0-47.3) | 9  | 40.9 (22.5-61.5) |

|          |                         |    |                  |    |                   |
|----------|-------------------------|----|------------------|----|-------------------|
|          | 3                       | 14 | 32.6 (20.0-47.3) | 10 | 45.5 (26.3-65.7)  |
|          | 4                       | 14 | 32.6 (20.0-47.3) | 2  | 9.1 (1.9-26.1)    |
| <b>1</b> | No of owners (horse's   | 39 |                  | 19 |                   |
| <b>4</b> | history)                |    |                  |    |                   |
|          | 1                       | 5  | 12.8 (5.1-25.8)  | 4  | 21.1 (7.6-42.6)   |
|          | 2                       | 14 | 35.9 (22.3-51.5) | 7  | 36.8 (18.2-59.1)  |
|          | 3                       | 14 | 35.9 (22.3-51.5) | 7  | 36.8 (18.2-59.1)  |
|          | 4                       | 6  | 15.4 (6.7-29.0)  | 1  | 5.3 (0.6-22.1)    |
| <b>1</b> | Contact with other      | 42 |                  | 21 |                   |
| <b>5</b> | stables                 |    |                  |    |                   |
|          | No                      | 10 | 23.8 (12.9-38.1) | 3  | 14.3 (4.2-33.4)   |
|          | Yes                     | 32 | 76.2 (61.9-87.1) | 18 | 85.7 (66.6-95.8)  |
| <b>1</b> | Stable change           | 42 |                  | 21 |                   |
| <b>6</b> |                         |    |                  |    |                   |
|          | No                      | 23 | 54.8 (39.8-69.1) | 10 | 47.6 (27.7-68.1)  |
|          | Yes                     | 19 | 45.2 (30.9-60.2) | 11 | 52.4 (31.9-72.3)  |
| <b>1</b> | Traveling abroad        | 43 |                  | 22 |                   |
| <b>7</b> |                         |    |                  |    |                   |
|          | No                      | 41 | 95.3 (85.9-99.0) | 21 | 95.5 (88.9-100.0) |
|          | Yes                     | 2  | 4.7 (1.0-14.1)   | 1  | 4.5 (0.5-20.2)    |
| <b>1</b> | Transporting frequency  | 43 |                  | 22 |                   |
| <b>8</b> |                         |    |                  |    |                   |
|          | Very seldom             | 9  | 20.9 (10.9-34.7) | 4  | 18.2 (6.5-37.6)   |
|          | Less than<br>once/month | 14 | 32.6 (20.0-47.3) | 9  | 40.9 (22.5-61.5)  |
|          | Once/month              | 18 | 41.9 (28.0-56.7) | 8  | 36.4 (18.9-57.1)  |
|          | Once/week               | 2  | 4.7 (1.0-14.1)   | 1  | 4.5 (0.5-19.3)    |
| <b>1</b> | Time spent outdoors at  | 43 |                  | 22 |                   |
| <b>9</b> | one time/h              |    |                  |    |                   |
|          | 2                       | 2  | 4.7 (1.0-14.1)   | 0  | 0.0 (0.0-10.7)    |
|          | 4                       | 14 | 32.6 (20.0-47.3) | 8  | 36.4 (18.9-57.1)  |
|          | 6                       | 24 | 55.8 (41.0-69.9) | 12 | 54.5 (34.3-73.7)  |
|          | Free access             | 3  | 7.0 (2.0-17.5)   | 2  | 9.1 (1.9-26.1)    |
| <b>2</b> | Sand paddock            | 43 |                  | 22 |                   |
| <b>0</b> |                         |    |                  |    |                   |
|          | No                      | 32 | 74.4 (60.1-85.6) | 18 | 81.8 (62.4-93.5)  |

|          |                          |    |                  |    |                    |
|----------|--------------------------|----|------------------|----|--------------------|
|          | Yes                      | 11 | 25.6 (14.4-39.9) | 4  | 18.2 (6.5-37.6)    |
| <b>2</b> | Grass paddock            | 43 |                  | 22 |                    |
| <b>1</b> | No                       | 8  | 18.6 (9.2-32.1)  | 5  | 22.7 (9.2-42.9)    |
|          | Yes                      | 35 | 81.4 (67.9-90.8) | 17 | 77.3 (57.1-90.8)   |
| <b>2</b> | Access to pasture        | 43 |                  | 22 |                    |
| <b>2</b> | No                       | 8  | 18.6 (9.2-32.1)  | 0  | 0.0 (0.0-10.7)     |
|          | Yes                      | 35 | 81.4 (67.9-90.8) | 22 | 100.0 (89.3-100.0) |
| <b>2</b> | Other paddock type       | 43 |                  | 22 |                    |
| <b>3</b> | No                       | 5  | 11.6 (4.6-23.6)  | 2  | 9.1 (1.9-26.1)     |
|          | Yes                      | 38 | 88.4 (76.4-95.4) | 20 | 90.9 (73.9-98.1)   |
| <b>2</b> | On paddock               | 43 |                  | 22 |                    |
| <b>4</b> | With many other horses   | 12 | 27.9 (16.7-43.3) | 3  | 13.6 (4.0-32.1)    |
|          | With one other horse     | 13 | 30.2 (18.6-45.8) | 5  | 22.7 (9.2-42.9)    |
|          | Alone                    | 17 | 39.5 (26.7-55.5) | 14 | 63.6 (42.9-81.1)   |
| <b>2</b> | Summer pasture           | 42 |                  | 22 |                    |
| <b>5</b> | No                       | 7  | 16.7 (7.8-30.0)  | 3  | 13.6 (4.0-32.1)    |
|          | Yes                      | 35 | 83.3 (70.0-92.2) | 19 | 86.4 (67.9-96.0)   |
| <b>2</b> | Time at pasture/months   | 37 |                  | 19 |                    |
| <b>6</b> | 0,5                      | 8  | 21.6 (10.8-36.7) | 3  | 15.8 (4.7-36.4)    |
|          | 1                        | 4  | 10.8 (3.8-23.7)  | 2  | 10.5 (2.3-29.7)    |
|          | 2                        | 8  | 21.6 (10.8-36.7) | 5  | 26.3 (4.4-10.8)    |
|          | 3                        | 13 | 35.1 (21.3-51.2) | 6  | 31.6 (14.4-53.9)   |
|          | 4                        | 4  | 10.8 (3.8-23.7)  | 3  | 15.8 (4.7-36.4)    |
| <b>2</b> | Trained while on pasture | 36 |                  | 19 |                    |
| <b>7</b> | No                       | 7  | 19.4 (9.1-34.4)  | 4  | 21.1 (7.6-42.6)    |
|          | Yes                      | 29 | 80.6 (65.6-90.9) | 15 | 78.9 (57.4-92.4)   |
| <b>2</b> | Actively competing       | 43 |                  | 22 |                    |
| <b>8</b> |                          |    |                  |    |                    |

|          |                             |    |                  |    |                    |
|----------|-----------------------------|----|------------------|----|--------------------|
|          | No                          | 25 | 58.1 (43.3-72.0) | 13 | 59.1 (38.5-77.5)   |
|          | Yes                         | 18 | 41.9 (28.0-56.7) | 9  | 40.9 (22.5-61.5)   |
| <b>2</b> | Discipline                  | 26 |                  | 11 |                    |
| <b>9</b> | Showjumping                 | 11 | 42.3 (25.0-61.3) | 4  | 36.4 (13.7-65.2)   |
|          | Dressage                    | 11 | 42.3 (25.0-61.3) | 5  | 45.5 (20.0-73.0)   |
|          | Trotting                    | 2  | 7.7 (1.6-22.5)   | 0  | 0.0 (0.0-20.0)     |
|          | Icelandic horse gaited test | 1  | 3.8 (0.4-16.6)   | 0  | 0.0 (0.0-20.0)     |
|          | Eventing                    | 1  | 3.8 (0.4-16.6)   | 2  | 18.2 (1.9-26.1)    |
| <b>3</b> | Use at riding school        | 42 |                  | 22 |                    |
| <b>0</b> | No                          | 37 | 88.1 (75.9-95.3) | 22 | 100.0 (89.3-100.0) |
|          | Yes                         | 5  | 11.9 (4.7-24.1)  | 0  | 0.0 (0.0-10.7)     |
| <b>3</b> | No of riders                | 41 |                  | 20 |                    |
| <b>1</b> | 1                           | 12 | 29.3 (17.1-44.2) | 8  | 40.0 (21.1-61.6)   |
|          | 2                           | 16 | 39.0 (25.3-54.3) | 10 | 50.0 (29.3-70.7)   |
|          | 3                           | 10 | 24.4 (13.3-39.0) | 2  | 10.0 (2.1-28.4)    |
|          | 4                           | 1  | 2.4 (0.3-10.8)   | 0  | 0.0 (0.0-11.7)     |
|          | 5                           | 2  | 4.9 (1.0-14.7)   | 0  | 0.0 (0.0-11.7)     |
| <b>3</b> | Previous diagnosis of       | 37 |                  | 21 |                    |
| <b>2</b> | EGUS                        |    |                  |    |                    |
|          | No                          | 20 | 54.1 (38.2-69.3) | 17 | 81.0 (60.8-93.2)   |
|          | Yes                         | 17 | 45.9 (30.7-61.8) | 4  | 19.0 (6.8-39.2)    |
| <b>3</b> | Sand enteropathy            | 37 |                  | 21 |                    |
| <b>3</b> | No                          | 28 | 75.7 (60.3-87.2) | 11 | 52.4 (31.9-72.3)   |
|          | Yes                         | 9  | 24.3 (12.8-39.7) | 10 | 47.6 (27.7-68.1)   |
| <b>3</b> | Weight loss                 | 36 |                  | 20 |                    |
| <b>4</b> | No                          | 20 | 55.6 (39.4-70.8) | 12 | 60.0 (38.4-78.9)   |
|          | Yes                         | 16 | 44.4 (29.2-60.6) | 8  | 40.0 (21.1-61.6)   |
| <b>3</b> | Colic                       | 42 |                  | 21 |                    |
| <b>5</b> | No                          | 25 | 59.5 (44.5-73.3) | 6  | 28.6 (12.9-49.7)   |

|          |                              |    |                  |    |                    |
|----------|------------------------------|----|------------------|----|--------------------|
|          | Yes                          | 17 | 40.5 (26.7-55.5) | 15 | 71.4 (50.3-87.1)   |
| <b>3</b> | Diarrhoea                    | 39 |                  | 22 |                    |
| <b>6</b> | No                           | 19 | 48.7 (36.0-66.4) | 11 | 50.0 (30.2-69.8)   |
|          | Yes                          | 20 | 51.3 (36.0-66.4) | 11 | 50.0 (30.2-69.8)   |
| <b>3</b> | Positive FEC                 | 38 |                  | 20 |                    |
| <b>7</b> | No                           | 31 | 81.6 (67.2-91.4) | 17 | 85.0 (65.1-95.6)   |
|          | Yes                          | 7  | 18.4 (8.6-32.8)  | 3  | 15.0 (53.6-89.8)   |
| <b>3</b> | Deworming freq.              | 42 |                  | 22 |                    |
| <b>8</b> | Less often than twice/year   | 3  | 7.1 (2.1-17.9)   | 1  | 4.5 (0.5-19.3)     |
|          | Twice/year                   | 24 | 57.1 (42.1-71.2) | 13 | 59.1 (38.5-77.5)   |
|          | 4 times/year                 | 13 | 31.0 (18.6-45.8) | 8  | 36.4 (18.9-57.1)   |
|          | More often than 4 times/year | 1  | 2.4 (0.3-10.6)   | 0  | 0.0 (0.0-10.7)     |
|          | No deworming                 | 1  | 2.4 (0.3-10.6)   | 0  | 0.0 (0.0-10.7)     |
| <b>3</b> | Use of antihelminthics       | 43 |                  | 22 |                    |
| <b>9</b> | No                           | 13 | 30.2 (18.1-44.9) | 5  | 22.7 (9.2-42.9)    |
|          | Yes                          | 30 | 69.8 (55.1-91.9) | 17 | 77.3 (57.1-90.8)   |
| <b>4</b> | EHV vaccination              | 21 |                  | 12 |                    |
| <b>0</b> | No                           | 12 | 57.1 (36.2-76.3) | 8  | 66.7 (38.8-87.5)   |
|          | Yes                          | 9  | 42.9 (23.7-6.8)  | 4  | 33.3 (12.5-61.2)   |
| <b>4</b> | Rabies vaccination           | 21 |                  | 11 |                    |
| <b>1</b> | No                           | 14 | 66.7 (45.4-83.7) | 9  | 81.8 (53.3-96.0)   |
|          | Yes                          | 7  | 33.3 (16.3-54.6) | 2  | 18.2 (4.0-46.7)    |
| <b>4</b> | Botulism vaccination         | 16 |                  | 10 |                    |
| <b>2</b> | No                           | 15 | 93.8 (74.3-99.3) | 10 | 100.0 (78.3-100.0) |

|          |                        |    |                  |    |                  |
|----------|------------------------|----|------------------|----|------------------|
|          | Yes                    | 1  | 6.3 (0.7-25.7)   | 0  | 0.0 (0.0-21.7)   |
| <b>4</b> | Use of NSAIDs          | 43 |                  | 22 |                  |
| <b>3</b> |                        |    |                  |    |                  |
|          | No                     | 16 | 37.2 (24.0-52.1) | 8  | 36.4 (18.9-57.1) |
|          | Yes                    | 27 | 62.8 (47.9-76.0) | 14 | 63.6 (42.9-81.1) |
| <b>4</b> | Use of nutraceuticals  | 41 |                  | 21 |                  |
| <b>4</b> | for prevention of EGUS |    |                  |    |                  |
|          | No                     | 31 | 75.6 (61.0-86.7) | 17 | 81.0 (60.8-93.2) |
|          | Yes                    | 10 | 24.4 (13.3-39.0) | 4  | 19.0 (6.8-39.2)  |
| <b>4</b> | Hay type               | 43 |                  | 22 |                  |
| <b>5</b> |                        |    |                  |    |                  |
|          | Hay                    | 18 | 41.9 (28.0-56.7) | 7  | 31.8 (15.5-52.6) |
|          | Haylage                | 13 | 30.2 (18.1-44.9) | 7  | 31.8 (15.5-52.6) |
|          | Hay & haylage          | 12 | 27.9 (16.3-42.4) | 8  | 36.4 (18.9-57.1) |
| <b>4</b> | Hay amount kg/d        | 34 |                  | 20 |                  |
| <b>6</b> |                        |    |                  |    |                  |
|          | 5-7                    | 1  | 2.9 (0.3-12.9)   | 6  | 30.0 (13.6-51.7) |
|          | 8-9                    | 8  | 23.5 (11.8-39.5) | 4  | 20.0 (7.2-40.8)  |
|          | 10-12                  | 15 | 44.1 (28.5-60.7) | 5  | 25.0 (10.2-46.4) |
|          | >12                    | 10 | 29.4 (16.2-45.9) | 4  | 20.0 (7.2-40.8)  |
| <b>4</b> | Concentrate amount l/d | 32 |                  | 19 |                  |
| <b>7</b> |                        |    |                  |    |                  |
|          | 0.2-0.9                | 4  | 12.5 (4.4-27.0)  | 4  | 21.1 (7.6-42.6)  |
|          | 1.0-1.5                | 6  | 18.8 (8.2-34.6)  | 4  | 21.1 (7.6-42.6)  |
|          | 1.6-2.0                | 5  | 15.6 (6.2-30.9)  | 4  | 21.1 (7.6-42.6)  |
|          | 2.1-2.5                | 1  | 3.1 (0.3-13.7)   | 0  | 0.0 (0.0-12.2)   |
|          | 2.6-3.0                | 4  | 12.5 (4.4-27.0)  | 1  | 5.3 (0.6-22.1)   |
|          | 3.6-4.0                | 5  | 15.6 (6.2-30.9)  | 0  | 0.0 (0.0-12.2)   |
|          | 4.1-4.5                | 3  | 9.4 (2.7-23.0)   | 0  | 0.0 (0.0-12.2)   |
|          | 4.6-5.0                | 1  | 3.1 (0.3-13.7)   | 2  | 10.5 (2.3-29.7)  |

|                      |              |    |                  |    |                  |
|----------------------|--------------|----|------------------|----|------------------|
|                      | > 5.0        | 3  | 9.4 (2.7-23.0)   | 0  | 0.0 (0.0-12.2)   |
| <b>4</b><br><b>8</b> | Gastroscopy  | 43 |                  | 22 |                  |
|                      | Hospitalized | 10 | 23.3 (12.6-37.3) | 9  | 40.9 (22.5-66.5) |
|                      | Outpatient   | 33 | 76.7 (62.7-87.4) | 13 | 59.1 (38.5-77.5) |
