# Supplementary material
Source: PubMed Central journal article supplement (PMC5153978)
Supplement: JVIM-30-1270-s003.pdf [file JVIM-30-1270-s003.pdf]

**Table 3a. Crude preliminary logistic regression analyses where only one independent variable in the model at a time with the response variable EGGD present vs healthy horses and horses with ESGD (full data).**

| Variable no | Variable                                 | Subclasses                           | Standard error | Wald p-value | Odds ratio (95% CI)  |
|-------------|------------------------------------------|--------------------------------------|----------------|--------------|----------------------|
| <b>1</b>    | Breed                                    |                                      |                | 0.003        |                      |
|             |                                          | Other breed vs Warmblood             | 0.475          | 0.002        | 0.234 (0.092-0.594)  |
|             |                                          | Other breed vs Finnhorse             | 0.729          | 0.008        | 0.143 (0.034-0.599)  |
|             |                                          | Warmblood vs Finnhorse               | 0.691          | 0.48         | 0.612 (0.158-2.372)  |
| <b>2</b>    | Sex (male vs female)                     |                                      | 0.417          | 0.61         | 0.808 (0.357-1.829)  |
| <b>3</b>    | Forage location                          |                                      |                | 0.78         |                      |
|             |                                          | Bucket vs ground                     | 0.697          | 0.66         | 1.363 (0.348-5.342)  |
|             |                                          | Bucket vs hay from a net             | 0.909          | 0.48         | 1.905 (0.321-11.311) |
|             |                                          | Ground vs hay from a net             | 0.667          | 0.62         | 1.397 (0.378-5.164)  |
| <b>4</b>    | Eating habits                            |                                      |                | 0.79         |                      |
|             |                                          | With other horses vs other variables | 0.830          | 0.59         | 1.571 (0.309-7.989)  |
|             |                                          | With other horses vs alone           | 0.498          | 0.53         | 1.371 (0.517-3.641)  |
|             |                                          | Other variables vs alone             | 0.748          | 0.86         | 0.873 (0.201-3.782)  |
| <b>5</b>    | Stable water communal vs ground well     |                                      | 0.409          | 0.85         | 1.081 (0.485-2.410)  |
|             |                                          |                                      |                |              |                      |
| <b>6</b>    | Paddock water                            |                                      |                | 0.78         |                      |
|             |                                          | Other vs ground well                 | 0.910          | 0.96         | 0.950 (0.160-5.651)  |
|             |                                          | Other vs communal                    | 0.929          | 0.71         | 0.706 (0.114-4.359)  |
|             |                                          | Communal vs ground well              | 0.436          | 0.50         | 0.743 (0.316-1.747)  |
| <b>7</b>    | Automatic water supply vs bucket         |                                      | 0.456          | 0.55         | 1.313 (0.537-3.205)  |
| <b>8</b>    | Living in loose housing system vs stable |                                      | 0.863          | 0.97         | 1.039 (0.192-5.633)  |
|             |                                          |                                      |                |              |                      |
| <b>9</b>    | Stable cleaning frequency 1/d vs 2/d     |                                      | 0.586          | 0.040        | 0.300 (0.095-0.946)  |
| <b>10</b>   | Bedding material                         |                                      |                | 0.78         |                      |
|             |                                          | Other vs peat                        | 0.869          | 0.81         | 1.231 (0.224-6.756)  |
|             |                                          | Other vs shavings                    | 0.940          | 0.91         | 0.900 (0.143-5.679)  |
|             |                                          | Other vs straw/straw pellets         | 0.907          | 0.57         | 1.667 (0.282-9.856)  |
|             |                                          | Peat vs shavings                     | 0.552          | 0.57         | 0.731 (0.248-2.158)  |
|             |                                          | Peat vs straw/straw pellets          | 0.494          | 0.54         | 1.354 (0.515-3.564)  |
|             |                                          | Shavings vs straw/straw pellets      | 0.610          | 0.31         | 1.852 (0.560-6.122)  |
| <b>11</b>   | Horse No. in the stable                  |                                      |                | 0.24         |                      |
|             |                                          | 15 vs 21                             | 0.600          | 0.16         | 0.43 (0.133-1.394)   |
|             |                                          | 15 vs 3                              | 0.622          | 0.68         | 1.296 (0.383-4.390)  |
|             |                                          | 15 vs 7                              | 0.552          | 0.65         | 1.287 (0.436-3.795)  |
|             |                                          | 21 vs 3                              | 0.652          | 0.091        | 3.014 (0.840-10.817) |

|           |                                                |       |       |                     |
|-----------|------------------------------------------------|-------|-------|---------------------|
|           | 21 vs 7                                        | 0.585 | 0.061 | 2.991 (0.950-9.418) |
|           | 3 vs 7                                         | 0.608 | 0.99  | 0.992 (0.301-3.268) |
| <b>12</b> | No. of caretakers                              |       | 0.036 |                     |
|           | 1-2 vs 3                                       | 0.449 | 0.82  | 0.904 (0.375-2.181) |
|           | 1-2 vs 4                                       | 0.685 | 0.012 | 0.181 (0.047-0.692) |
|           | 3 vs 4                                         | 0.687 | 0.019 | 0.200 (0.052-0.768) |
|           | 1-2 vs 4                                       | 0.648 | 0.010 | 0.190 (0.053-0.677) |
| <b>13</b> | No. of owners (horse's history)                |       | 0.74  |                     |
|           | 1 vs 2                                         | 0.619 | 0.71  | 1.255 (0.373-4.221) |
|           | 1 vs 3                                         | 0.644 | 0.76  | 1.217 (0.344-4.302) |
|           | 1 vs 4                                         | 0.929 | 0.47  | 0.509 (0.082-3.142) |
|           | 2 vs 3                                         | 0.505 | 0.95  | 0.970 (0.361-2.609) |
|           | 2 vs 4                                         | 0.838 | 0.28  | 0.406 (0.078-2.096) |
|           | 3 vs 4                                         | 0.857 | 0.31  | 0.418 (0.078-2.243) |
|           | Contact to horses from other stables yes vs no | 0.605 | 0.42  | 1.622 (0.496-5.311) |
| <b>14</b> | Changing stable yes vs no                      | 0.414 | 0.75  | 1.143 (0.508-2.570) |
| <b>15</b> | Traveling abroad yes vs no                     | 0.711 | 0.93  | 0.938 (0.233-3.775) |
| <b>16</b> | Transporting frequency                         |       | 0.66  |                     |
|           | Less than once/month vs very seldom            | 0.533 | 0.86  | 1.100 (0.387-3.124) |
|           | Less than once/month vs once/month             | 0.506 | 0.29  | 0.584 (0.217-1.576) |
|           | Less than once/month vs once/week              | 0.768 | 0.88  | 0.890 (0.197-4.012) |
|           | Very seldom vs once/month                      | 0.559 | 0.26  | 0.531 (0.178-1.589) |
|           | Very seldom vs once/week                       | 0.804 | 0.79  | 0.810 (0.167-3.912) |
|           | Once/month vs once/week                        | 0.786 | 0.59  | 1.523 (0.326-7.116) |
| <b>17</b> | Time outdoors 4h vs 6h                         | 0.463 | 0.49  | 1.375 (0.555-3.408) |
| <b>18</b> | Sand paddock yes vs no                         | 0.464 | 0.30  | 0.618 (0.249-1.536) |
| <b>19</b> | Grass paddock yes vs no                        | 0.474 | 0.48  | 1.398 (0.552-3.542) |
| <b>20</b> | Pasture turnout yes vs no                      | 0.666 | 0.18  | 0.405 (0.110-1.494) |
| <b>21</b> | Other type of paddock yes vs no                | 0.722 | 0.95  | 1.051 (0.255-4.329) |
| <b>22</b> | Paddock company                                |       | 0.57  |                     |
|           | Many other horses vs one other horse           | 0.582 | 0.72  | 1.232 (0.393-3.857) |
|           | Many other horses vs alone                     | 0.520 | 0.31  | 1.690 (0.610-4.682) |
|           | One other horse vs alone                       | 0.487 | 0.52  | 1.371 (0.528-3.560) |
| <b>23</b> | Summer pasture yes vs no                       | 0.529 | 0.82  | 1.131 (0.401-3.192) |
| <b>24</b> | Time spent at pasture (months)                 |       | 0.83  |                     |
|           | 2 vs 3                                         | 0.634 | 0.74  | 1.232 (0.355-4.271) |
|           | 2 vs <= 3                                      | 0.699 | 0.80  | 0.840 (0.214-3.304) |
|           | 2 vs >= 4                                      | 0.727 | 0.56  | 1.527 (0.367-6.354) |
|           | 3 vs <= 1                                      | 0.590 | 0.52  | 0.682 (0.215-2.165) |
|           | 3 vs >= 4                                      | 0.623 | 0.73  | 1.240 (0.365-4.206) |
|           | <= 1 vs >= 4                                   | 0.689 | 0.39  | 1.818 (0.471-7.011) |

|    |                                                        |       |       |                      |
|----|--------------------------------------------------------|-------|-------|----------------------|
| 26 | Training while on pasture yes vs no                    | 0.536 | 0.44  | 0.663 (0.232-1.897)  |
| 27 | Horse actively competing yes vs no                     | 0.421 | 0.21  | 0.586 (0.257-1.338)  |
| 28 | Showjumping vs dressage                                | 0.658 | 1.00  | 1.000 (0.275-3.634)  |
| 29 | Use at riding school yes vs no                         | 1.089 | 0.30  | 0.325 (0.038-2.746)  |
| 30 | No. Of riders                                          |       |       |                      |
| 31 | 1 vs 2                                                 | 0.472 | 0.39  | 0.667 (0.264-1.684)  |
|    | 1 vs >= 3                                              | 0.703 | 0.033 | 0.224 (0.057-0.888)  |
|    | 2 vs >= 3                                              | 0.698 | 0.12  | 0.336 (0.086-1.318)  |
| 32 | 1-2 vs >=3                                             | 0.659 | 0.052 | 0.278 (0.076-1.010)  |
| 33 | Previous gastric ulcers yes vs no                      | 0.435 | 0.58  | 0.786 (0.335-1.842)  |
| 34 | Recurrent gastric ulcers yes vs no                     | 1.067 | 0.10  | 0.173 (0.021-1.399)  |
| 35 | Sand enteropathy yes vs no                             | 0.461 | 0.38  | 1.505 (0.610-3.718)  |
| 36 | Weight loss yes vs no                                  | 0.430 | 0.81  | 1.108 (0.477-2.575)  |
| 37 | Colic yes vs no                                        | 0.427 | 0.086 | 2.084 (0.901-4.816)  |
| 38 | Diarrhoea yes vs no                                    | 0.429 | 0.95  | 1.029 (0.444-2.383)  |
| 39 | Positive FEC yes vs no                                 | 0.605 | 0.64  | 1.325 (0.405-4.334)  |
| 40 | Deworming                                              |       |       |                      |
|    | Twice/year vs less often than twice/year               | 0.778 | 0.51  | 1.674 (0.365-0.508)  |
|    | Twice/year vs min. 4 times/year                        | 0.456 | 0.47  | 1.395 (0.571-0.466)  |
|    | Less often than twice/year vs min. 4 times/year        | 0.818 | 0.82  | 0.833 (0.168-0.824)  |
| 41 | Use of anthelmintics yes vs no                         | 0.481 | 0.94  | 0.965 (0.376-2.478)  |
| 42 | Vaccination against EHV yes vs no                      | 0.531 | 0.63  | 1.292 (0.456-3.659)  |
| 43 | Vaccination against rabies yes vs no                   | 0.597 | 0.65  | 1.308 (0.406-4.213)  |
| 44 | Vaccination against botulism yes vs no                 | 0.875 | 0.27  | 2.642 (0.476-14.674) |
| 45 | Use of NSAIDs yes vs no                                | 0.425 | 0.83  | 1.093 (0.476-2.512)  |
| 46 | Use of nutraceuticals for prevention of EGUS yes vs no | 0.508 | 0.95  | 1.032 (0.381-2.793)  |
| 47 | Dry hay vs haylage                                     | 0.516 | 0.14  | 2.145 (0.780-5.901)  |
| 48 | Amount of hay/haylage kg/d                             |       |       |                      |
|    | 10-12 vs 5-7                                           | 0.720 | 0.013 | 6.000 (1.462-24.626) |
|    | 10-12 vs 8-9                                           | 0.714 | 0.62  | 1.429 (0.353-5.788)  |
|    | 10-12 vs > 12                                          | 0.588 | 0.16  | 2.269 (0.716-7.188)  |
|    | 5-7 vs 8-9                                             | 0.822 | 0.081 | 0.283 (0.048-1.193)  |
|    | 5-7 vs > 12                                            | 0.716 | 0.17  | 0.378 (0.093-1.593)  |
|    | 8-9 vs > 12                                            | 0.709 | 0.51  | 1.588 (0.395-6.397)  |
| 49 | Amount of concentrate l/d                              |       |       |                      |
|    | 0.2-0.9 vs 1.0-1.5                                     | 0.868 | 0.77  | 0.778 (0.142-4.265)  |
|    | 0.2-0.9 vs 1.6-2.0                                     | 0.812 | 0.95  | 1.050 (0.214-5.158)  |
|    | 0.2-0.9 vs 2.1-3.5                                     | 0.996 | 0.29  | 0.350 (0.050-2.467)  |

|           |                            |       |      |                     |
|-----------|----------------------------|-------|------|---------------------|
|           | 0.2-0.9 vs >3.6            | 0.832 | 0.21 | 0.350 (0.068-1.789) |
|           | 1.0-1.5 vs 1.6-2.0         | 0.792 | 0.71 | 1.350 (0.286-6.379) |
|           | 1.0-1.5 vs 2.1-3.5         | 0.980 | 0.42 | 0.450 (0.066-3.074) |
|           | 1.0-1.5 vs > 3.6           | 0.813 | 0.33 | 0.450 (0.091-2.215) |
|           | 1.6-2.0 vs 2.1-3.5         | 0.931 | 0.24 | 0.333 (0.054-2.067) |
|           | 1.6-2.0 vs > 3.6           | 0.753 | 0.14 | 0.333 (0.076-1.458) |
|           | 2.1-3.5 vs > 3.6           | 0.949 | 1.00 | 1.000 (0.156-6.420) |
| <b>50</b> | Hospitalized vs outpatient | 0.424 | 0.20 | 0.581 (0.253-1.335) |
