# Supplementary material
Source: PubMed Central journal article supplement (PMC5153978)
Supplement: JVIM-30-1270-s004.pdf [file JVIM-30-1270-s004.pdf]

**Table 4a. Crude preliminary logistic regression analyses where only one independent variable in the model at a time with the response variable pure EGGD vs healthy horses (a subset of the data).**

| Variable No | Variable Subclasses                  | Standard error | Wald p-value | Odds ratio (95% CI)  |
|-------------|--------------------------------------|----------------|--------------|----------------------|
| <b>1</b>    | Breed                                |                | 0.003        |                      |
|             | Other breed vs Warmblood             | 0.696          | 0.001        | 0.106 (0.027-0.413)  |
|             | Other breed vs Finnhorse             | 0.983          | 0.015        | 0.091 (0.013-0.624)  |
|             | Warmblood vs Finnhorse               | 0.877          | 0.87         | 0.861 (0.154-4.799)  |
| <b>2</b>    | Sex (male vs female)                 | 0.552          | 0.43         | 0.648 (0.220-1.914)  |
| <b>3</b>    | Forage location                      |                | 0.55         |                      |
|             | Bucket vs ground                     | 1.132          | 0.39         | 2.639 (0.287-24.243) |
|             | Bucket vs hay net                    | 1.483          | 0.28         | 5.000 (0.273-91.514) |
|             | Ground vs hay net                    | 1.039          | 0.54         | 1.895 (0.247-14.532) |
| <b>4</b>    | Eating habits                        |                | 0.48         |                      |
|             | With other horses vs other           | 1.326          | 0.88         | 1.222 (0.091-16.429) |
|             | With other horses vs alone           | 0.717          | 0.25         | 2.276 (0.558-9.280)  |
|             | Other vs alone                       | 1.193          | 0.602        | 1.862 (0.180-19.298) |
| <b>5</b>    | Stable water communal vs ground well | 0.528          | 0.59         | 1.333 (0.473-3.755)  |
|             | Paddock water                        |                | 0.68         |                      |
| <b>6</b>    | Other vs ground well                 | 1.063          | 0.60         | 0.571 (0.071-4.594)  |
|             | Other vs communal                    | 1.096          | 0.42         | 0.412 (0.048-3.530)  |
|             | Ground well vs communal              | 0.577          | 0.57         | 0.721 (0.233-2.232)  |
| <b>7</b>    | Automatic water supply vs bucket     | 0.600          | 0.72         | 1.238 (0.382-4.008)  |
| <b>8</b>    | Loose housing system vs stable       | 0.953          | 0.78         | 0.760 (0.119-4.984)  |
| <b>9</b>    | Stable cleaning frequency 1 vs 2     | 0.706          | 0.13         | 0.340 (0.085-1.357)  |
| <b>10</b>   | Bedding material                     |                | 0.69         |                      |
|             | Other vs peat                        | 1.207          | 0.76         | 1.440 (0.135-15.329) |
|             | Other vs shavings                    | 1.316          | 0.40         | 2.999 (0.227-39.591) |
|             | Other vs straw/straw pellets         | 1.297          | 0.89         | 1.200 (0.094-15.254) |
|             | Peat vs shavings                     | 0.723          | 0.31         | 2.083 (0.505-8.600)  |
|             | Peat vs straw/straw pellets          | 0.688          | 0.791        | 0.833 (0.216-3.210)  |
|             | Shavings vs straw/straw pellets      | 0.866          | 0.29         | 0.400 (0.073-2.184)  |
| <b>11</b>   | No. of horses in the stable          |                | 0.25         |                      |
|             | 15 vs 21                             | 0.726          | 0.066        | 0.263 (0.063-1.093)  |
|             | 15 vs 3                              | 0.822          | 1.00         | 1.000 (0.200-5.004)  |
|             | 15 vs 7                              | 0.709          | 0.80         | 0.833 (0.208-3.345)  |
|             | 21 vs 3                              | 0.868          | 0.12         | 3.800 (0.694-20.808) |
|             | 21 vs 7                              | 0.762          | 0.13         | 3.167 (0.711-14.095) |
|             | 3 vs 7                               | 0.853          | 0.83         | 0.833 (0.157-4.436)  |
| <b>12</b>   | No. Of caretakers                    |                | 0.15         |                      |

|           |                                     |       |       |                      |
|-----------|-------------------------------------|-------|-------|----------------------|
|           | 1-2 vs 3                            | 0.581 | 0.91  | 1.071 (0.343-3.349)  |
|           | 1-2 vs 4                            | 0.859 | 0.073 | 0.214 (0.040-1.154)  |
|           | 3 vs 4                              | 0.862 | 0.062 | 0.200 (0.037-1.083)  |
|           | 1-2 vs 4                            | 0.810 | 0.052 | 0.207 (0.042-1.013)  |
| <b>13</b> | No. Of owners                       |       | 0.68  |                      |
|           | 1 vs 2                              | 0.815 | 0.56  | 0.625 (0.127-3.088)  |
|           | 1 vs 3                              | 0.815 | 0.56  | 0.625 (0.127-3.088)  |
|           | 1 vs 4                              | 1.217 | 0.22  | 0.208 (0.017-2.518)  |
|           | 2 vs 3                              | 0.655 | 1.00  | 1.000 (0.277-3.608)  |
|           | 2 vs 4                              | 1.175 | 0.35  | 0.333 (0.033-3.336)  |
|           | 3 vs 4                              | 1.175 | 0.35  | 0.333 (0.033-3.336)  |
| <b>14</b> | Change of stable no vs yes          | 0.536 | 0.59  | 1.332 (0.466-3.805)  |
| <b>15</b> | Traveling abroad no vs yes          | 1.254 | 0.99  | 0.976 (0.084-11.397) |
| <b>16</b> | Transporting frequency              |       | 0.93  |                      |
|           | Less than once/month vs very seldom | 0.737 | 0.62  | 0.691 (0.163-2.933)  |
|           | Less than once/month vs once/month  | 0.603 | 0.54  | 0.691 (0.212-2.252)  |
|           | Less than once/month vs once/week   | 1.297 | 0.85  | 0.778 (0.061-9.885)  |
|           | Very seldom vs once/month           | 0.736 | 1.00  | 1.000 (0.236-4.231)  |
|           | Very seldom vs once/week            | 1.364 | 0.93  | 1.125 (0.078-16.307) |
|           | Once/month vs once/week             | 1.296 | 0.93  | 1.125 (0.089-14.276) |
| <b>17</b> | Time spent outdoors 4 vs 6h/d       | 0.567 | 0.81  | 0.875 (0.288-2.658)  |
| <b>18</b> | Sand paddock no vs yes              | 0.654 | 0.51  | 1.547 (0.429-5.573)  |
| <b>19</b> | Grass paddock no vs yes             | 0.642 | 0.70  | 1.287 (0.365-4.530)  |
| <b>20</b> | Other paddock no vs yes             | 0.881 | 0.76  | 0.760 (0.135-4.274)  |
| <b>21</b> | Summer pasture no vs yes            | 0.747 | 0.75  | 1.267 (0.293-5.472)  |
| <b>22</b> | Pasture time (months)               |       | 0.90  |                      |
|           | 2 vs 3                              | 0.754 | 0.69  | 0.738 (0.168-3.237)  |
|           | 2 vs <= 3                           | 0.780 | 0.60  | 0.667 (0.145-3.075)  |
|           | 2 vs >= 4                           | 0.953 | 0.85  | 1.200 (0.185-7.770)  |
|           | 3 vs <= 1                           | 0.726 | 0.89  | 0.903 (0.218-3.745)  |
|           | 3 vs >= 4                           | 0.909 | 0.59  | 1.625 (0.273-9.658)  |
|           | <= 1 vs >= 4                        | 0.931 | 0.53  | 1.800 (0.290-11.161) |
| <b>23</b> | Training while on pasture no vs yes | 0.703 | 0.89  | 0.905 (0.228-3.589)  |
| <b>24</b> | Actively competing no vs yes        | 0.533 | 0.94  | 0.962 (0.339-2.731)  |
| <b>25</b> | Showjumping vs dressage             | 0.795 | 0.78  | 1.250 (0.263-5.936)  |
| <b>26</b> | No. Of riders                       |       | 0.22  |                      |
|           | 1 vs 2                              | 0.609 | 0.92  | 0.937 (0.284-3.903)  |
|           | 1 vs >= 3                           | 0.886 | 0.098 | 0.231 (0.041-1.311)  |
|           | 2 vs >= 3                           | 0.860 | 0.10  | 0.246 (0.046-1.328)  |
| <b>27</b> | 1-2 vs >= 3                         | 0.817 | 0.080 | 0.239 (0.048-1.188)  |
| <b>28</b> | Previous gastric ulcer no vs yes    | 0.646 | 0.047 | 0.277 (0.078-0.982)  |
| <b>29</b> | Sand enteropathy no vs yes          | 0.581 | 0.074 | 2.828 (0.905-8.833)  |

|           |                                                         |       |       |                        |
|-----------|---------------------------------------------------------|-------|-------|------------------------|
| <b>30</b> | Weight loss no vs yes                                   | 0.566 | 0.75  | 0.833 (0.275-2.529)    |
| <b>31</b> | Colic no vs yes                                         | 0.576 | 0.02  | 3.676 (1.188-11.376)   |
| <b>32</b> | Diarrhoea no vs yes                                     | 0.533 | 0.923 | 0.950 (0.334-2.702)    |
| <b>33</b> | Positive FEC no vs yes                                  | 0.753 | 0.743 | 0.782 (0.179-3.420)    |
| <b>34</b> | Deworming                                               |       | 0.91  |                        |
|           | Twice/year vs less often than twice/year                | 1.205 | 0.69  | 0.616 (0.058-6.530)    |
|           | Twice/year vs min. 4 times/year                         | 0.561 | 0.92  | 1.055 (0.351-3.169)    |
|           | Less often than twice/year vs min. 4 times/year         | 1.237 | 0.66  | 1.714 (0.152-19.348)   |
| <b>35</b> | Use of antihelminths no vs yes                          | 0.608 | 0.52  | 1.473 (0.448-4.846)    |
| <b>36</b> | Vaccination against EHV no vs yes                       | 0.755 | 0.59  | 0.667 (0.152-2.926)    |
| <b>37</b> | Vaccination against rabies no vs yes                    | 0.909 | 0.37  | 0.444 (0.075-2.637)    |
| <b>38</b> | Use of NSAIDs no vs yes                                 | 0.544 | 0.95  | 1.037 (0.357-3.012)    |
| <b>39</b> | Use of neutraceuticals for prevention of EGUS no vs yes | 0.664 | 0.64  | 0.729 (0.198-2.681)    |
| <b>40</b> | Hay vs haylage                                          | 0.647 | 0.62  | 1.385 (0.390-4.918)    |
| <b>41</b> | Amount of hay/haylage kg/d                              |       | 0.085 |                        |
|           | 10-12 vs 5-7                                            | 1.197 | 0.016 | 17.999 (1.723-188.061) |
|           | 10-12 vs 8-9                                            | 0.801 | 0.61  | 1.500 (0.312-7.210)    |
|           | 10-12 vs > 12                                           | 0.785 | 0.82  | 1.200 (0.257-5.593)    |
|           | 5-7 vs 8-9                                              | 1.242 | 0.045 | 0.083 (0.007-0.950)    |
|           | 5-7 vs > 12                                             | 1.232 | 0.028 | 0.067 (0.006-0.745)    |
|           | 8-9 vs > 12                                             | 0.851 | 0.79  | 0.800 (0.151-4.245)    |
| <b>42</b> | Amount of concentrate l/d                               |       | 0.50  |                        |
|           | 0.2-0.9 vs 1.0-1.5                                      | 0.957 | 0.67  | 0.667 (0.102-4.354)    |
|           | 0.2-0.9 vs 1.6-2.0                                      | 0.975 | 0.82  | 0.800 (0.118-5.404)    |
|           | 0.2-0.9 vs 2.1-3.5                                      | 1.304 | 0.22  | 0.200 (0.016-2.576)    |
|           | 0.2-0.9 vs >3.6                                         | 1.041 | 0.085 | 0.167 (0.022-1.282)    |
|           | 1.0-1.5 vs 1.6-2.0                                      | 0.931 | 0.85  | 1.200 (0.194-7.441)    |
|           | 1.0-1.5 vs 2.1-3.5                                      | 1.271 | 0.34  | 0.300 (0.025-3.626)    |
|           | 1.0-1.5 vs > 3.6                                        | 1.000 | 0.17  | 0.250 (0.035-1.775)    |
|           | 1.6-2.0 vs 2.1-3.5                                      | 1.285 | 0.28  | 0.250 (0.020-3.100)    |
|           | 1.6-2.0 vs > 3.6                                        | 1.017 | 0.12  | 0.208 (0.028-1.528)    |
|           | 2.1-3.5 vs > 3.6                                        | 1.335 | 0.89  | 0.833 (0.061-11.417)   |
| <b>43</b> | Gastroscopy                                             |       |       |                        |
|           | Hospitalized vs outpatient                              | 0.564 | 0.14  | 0.438 (0.145-1.323)    |
