# Supplementary material
Source: PubMed Central journal article supplement (PMC5153978)
Supplement: JVIM-30-1270-s005.pdf [file JVIM-30-1270-s005.pdf]

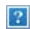

EGGES - tutkimuksen tarkoitus on kartoittaa riskitekijöitä hevosten rauhasmahan alueen muutoksiin.

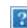

\*

EGGES - The aim of this study is to find possible risk factors for EGGES.

## EGGES - Equine Glandular Gastritis Erosion Syndrome

Tämä tutkimus tehdään Helsingin yliopiston eläinlääketieteellisen tiedekunnan lisensiaatin tutkielmana.

Kysymykset kartoittavat hevosen tilannetta viimeisen vuoden aikana ennen mahan tähystystä, ellei kysymyksessä ole mainittu jotakin muuta ajanjaksoa.

Tähdellä merkityt kysymykset ovat pakollisia.

\*

This is a licentiate thesis study done for the University of Helsinki faculty of veterinary medicine.

Please, answer the questions based on the information one year prior to the gastroscopy of the stomach, unless otherwise stated in a question.

The questions marked with a star are compulsory.

### Perustiedot / Basic information

1. Omistajan nimi / Owner's name

2. Puhelinnumero / Phonenummer

3. Katuosoite / Street address

4. Postinumero / ZIP code

5. Postitoimipaikka / City

6. Hevosen nimi / Horse's name

7. Hevosen rotu / Breed of the horse

Puoliverinen / Warmblood

Lämminverinen / Standardbred

Valitse Suomenhevonen / Finnhorse

Islanninhevonen / Icelandic horse

poni / Pony

Joku muu / Other

7b. Jos joku muu, niin mikä? / if something else, what?

### Jalostus / Breeding

8. Hevosen sukupuoli / Sex of the horse

Ori / Stallion

Valitse /Choose Tamma / Mare

Ruuna /Gelding

9. Jos ori / If a stallion

Käytetäänkö jalostukseen? Is the horse used for breeding?

Kyllä / Yes

Ei / No

10. Jos Tamma / If a mare

Onko varsonut? / Has the mare foaled?

Kyllä / Yes

Ei / No

### Ruokinta / Feeding

11. Mitä Hevonen syö? / What does the horse eat?

mitä / What

paljonko (kg/vrk). Jos heinää vapaasti arvioi monta kg syö/ How much (kg per day). If food available all the time, give an estimate how many kg's the horse eats

Korsirehu (esim. heinä,säilöheinä) / Forage

Väkirehu (esim. kaura, mysli) / Concentrated feed

12. Mitä ravintolisiä hevonen saa päivittäin? / What supplements are given to the horse daily?

Tuote / Tuotteet, Product /Products

Määrä vuorokaudessa / Daily dosage

Vitamiinit, öljyt, kivennäiset jne. / Vitamins, oils, minerals etc.

13. Kuinka pitkä on pisin ruokintaväli yhden vuorokauden aikana? / How long is the longest time between meals?

3-4h

5-6h

Valitse lähinnä oleva aika / Choose the most relevant time

7-8h

yli 8h / Over 8h

Ruokaa koko ajan saatavilla / Food available constantly

14. Mistä hevonen syö ruokansa pääasiassa? / From where does the horse eat its food mainly?

Maa / Ground

Korsirehu (esim.heinä) / Forage

Astia / Bucket or similar

Verkko / Hay net

15. Entä väkirehun / What about concentrated feed?

Väkirehu (esim. kaura, mysli) / Concentrated feed

Astia / Bucket or similar

Maa / Ground

16. Syökö hevonen pääasiassa: / Does the horse eat mainly:

Yksin karsinassa/tarhassa / Alone in the stable/ paddock

Valitse Muiden kanssa samassa tilassa / In the same space with other horses

Muu / Other

16b. Jos muu, niin mikä? / If other, what?

17. Mikä on hevosen pääasiallinen veden lähde? / What is the main water source for the horse

Tallissa / In the stable

Kunnallinen vesi / Municipal water

Kaivovesi / Ground water from a well

Joku muu / Other

Ulkona tarhassa/laitumella / Outdoors in pasture/paddock

Kunnallinen vesi / Municipal water

Kaivovesi / Ground water from a well

Joku muu / Other

17b. Jos muu veden lähde, niin mikä? / If other water source, what is it?

18. Mistä hevonen juo tallissa? / What is the water supply in the stables?

Ämpäri /Bucket

Valitse Automaatti / Automatic water bowl

Joku muu /Something else

18b. Joku muu, mikä? / Something else, what?

## Asuminen / Living

19. Missä hevonen asuu? / Where does the horse live?

Tallissa / In the stable

Valitse / Choose

Pihatossa / Field shelter

Jossain muussa / Somewhere else

19b. Jos muualla, niin missä? / If somewhere else, where?

20. Kuinka usein hevosen karsina /pihatto siivotaan? / How often is horse's living area cleaned?

- Valitse 3-4 krt päivässä / 3-4 times a day  
2 krt päivässä / twice a day  
1 kerran päivässä / once a day  
Harvemmin kuin kerran päivässä / Less than once a day

21. Mitä kuiviketta hevosella käytetään? (valitse yksi, tarvittaessa useampi) / What bedding is used? (pick one. If needed pick more than one)

- Puru / Shavings  
Olki / Straw  
Olkipelletti / straw pellets  
Turve / Peat  
Puuhake / Woodchips  
Vaihtelee sen mukaan mitä saa / Changes with what bedding is available  
Joku muu / Something else

21b. Jos muu, niin mikä? / If other, what?

22. Kuinka monta hevosta asuu samassa tallissa/pihatossa? / How many horses live in the same stable?

- 1-4  
5-10  
Valitse 11-20  
yli 21 / Over 21  
Ei muita hevosia tallissa/pihatossa / No other horses in the same stable/paddock

23. Kuinka monta ihmistä käsittelee hevosta säännöllisesti? / How many persons take care of the horse regularly?

- 1  
2  
Valitse 3  
4 tai enemmän / 4 or more

24. Kuinka monta omistajaa hevosella on ollut? / How many owners has the horse had?

- 1  
2  
Valitse 3  
4 tai enemmän / 4 or more  
Ei tietoa / Not known

25. Onko hevonen viimeisen vuoden aikana ollut tekemisissä toisista talleista olevien hevosten kanssa? / Has the horse been in contact with horses from other stables in the last year?

- Valitse / Choose Kyllä / Yes  
Ei / No

26. Onko hevonen vaihtanut tallipaikkaa viimeisen vuoden aikana? / Has the horse changed stables in the last year?

- Valitse / Choose Kyllä / Yes  
Ei / No

27. Onko hevonen matkustanut ulkomaille viimeisen vuoden aikana? / Has the horse been transported abroad in the last year?

- Valitse / Choose Kyllä / Yes  
Ei / No  
Ei tietoa / Not known

28. Kuinka usein hevosta kuljetetaan? / How often is the horse transported?

- Valitse / Choose Viikoittain / weekly  
Joka kuukausi / Every month  
Harvemmin kuin kerran kuussa / Less than once a month  
Ei juuri koskaan / Very rarely

## Ulkoilu / Outdoor

29. Kuinka usein hevonen ulkoilee tarhassa/laitumella? / How often is the horse taken outdoors?

- Valitse Joka päivä / Every day  
Vähintään 5 kertaa viikossa / At least 5 times a week  
2-4 kertaa viikossa / 2-4 times per week  
Kerran viikossa tai harvemmin / Once a week or less  
Vapaa pääsy ulos / Free access to the outdoors

30. Kuinka pitkään hevonen ulkoilee kerralla? / For how long is the horse outdoors at a time?

1-2h

3-5h

Valitse

yli 6h / Over 6h

Vapaa pääsy ulos / Free access to the outdoors

31. Missä hevonen ulkoilee? (valitse se missä ulkoilee pääsääntöisesti ja jos kahdessa yhtä paljon, niin valitse molemmat) / Where is the horse kept when outdoors ( pick the one that is most relevant and if equal times at 2 different paddocks then pick both)

Hiekkapohjainen tarha / Sand paddock

Ruohopohjainen tarha / Grass paddock

Laidun / Pasture

Muu/ Other

31b. Jos muussa, niin missä? / If other, where?

32. Miten hevonen ulkoilee? / When out in the paddock/pasture, is the horse:

Yksin / Alone

Valitse Yhden hevosen kanssa / with one other horse

Useamman muun hevosen kanssa / With many other horses

Jonkun muun eläimen kanssa / With some other animal

32b. Jos muun eläimen, niin minkä? / If other animal, what?

33. Pääseekö hevonen kesällä laitumelle? / Is the horse on pasture during the summer?

Valitse / Choose Kyllä / Yes

Ei / No

34. Jos kyllä: kuinka kauan hevonen on laitumella? / If yes, how long the horse is on pasture

alle 1kk / less than 1 month

1kk / 1 month

Valitse 2kk / 2 months

3kk / 3 months

4kk / 4 months

5kk tai enemmän / 5 months or more

35. Treenataanko laitumellaoloaikana? / Is the horse trained during pasture?

Valitse / Choose Kyllä / Yes

Ei / No

## Liikunta / Training

36. Onko hevonen kilpahevonen? (kilpailee säännöllisesti) / Is the horse a racehorse or actively competing ridinghorse?

Valitse / Choose Kyllä / Yes

Ei / No

37. Jos kyllä, niin mikä on ensisijainen laji? / If yes, what type of racing/competing primarily?

Kouluratsastus / Dressage

Esteratsastus / Show jumping

Ravit / Trotting race

Valjakkoajo / Carriage training

Valitse yksi / Choose one Länneratsastus / western riding

Matkaratsastus / long-distance riding

Vikellys / vaulting

Laukkakilpailut / Thoroughbred flat racing/steeplechasing

Askellajikilpailut / Gait horse

Kenttäratsastus / Combined training

38. Onko hevonen ratsastuskoulukäytössä? / Is the horse used in a riding school?

Valitse / Choose Kyllä / Yes

Ei / No

39. Kuinka monta eri ratsastajaa hevosella on? / How many different riders the horse has?

1

2

Valitse 3

4

5 tai enemmän / 5 or more

## Terveys / Health

40. Onko hevosella koskaan todettu mahahaavaa tähystyksellä? / Has the horse ever been diagnosed for gastric ulcer by gastroscopy?

Kyllä / Yes

Valitse / Choose Ei / No

Ei tietoa / Not known

41. Jos kyllä, niin koska? / If yes, when?

viimeisen 6kk aikana / In the last 6 months

6kk-1v sitten / 6mths-1 yr ago

Valitse 1-2v sitten / 1-2 yrs ago

yli 2v sitten / over 2 yrs ago

Ei tietoa / Not known

42. Onko hevosta koskaan hoidettu seuraavilla lääkkeillä? / Has the horse ever been treated with any of these?

Omepratsoli (Gastrogard)

Sukralfaatti (Antepsin)

Ranitidiini (Ranimex, Ranixal ym.)

Ei millään näistä / Not with any of these

Ei tietoa / Not known

43. Jos hevosta hoidettiin edellisen kysymyksen lääkkeillä, niin kuinka kauan lääkitys kesti? / If the horse was treated with any of the medications in the previous question, how long did the medication last for?

1viikko / 1 week

2 viikkoa / 2 weeks

Valitse 3 viikkoa / 3 weeks

4 viikkoa / 4 weeks

5 viikkoa tai enemmän / 5 weeks or more

44. Onko hevosella ollut toistuvia eläinlääkärin diagnosoimia mahahaavoja? / Has the horse had recurrent gastric ulcers diagnosed by a Vet?

Kyllä / Yes

Valitse / Choose Ei / No

Ei tietoa / Not known

45. Jos kyllä, niin kuinka monta kertaa mahahaavaa on hoidettu lääkkeillä? / If yes, how many times medication has been used as a treatment?

1 kerran / once

2 kertaa / twice

Valitse Useammin kuin 2 kertaa / More than twice

Ei tietoa/ Not known

46. Onko hevosella diagnosoitu röntgenkuvan perusteella hiekkainterropatia (hiekkaa paksusuolessa)? / Has the horse been diagnosed for sand in the colon by x-ray?

Kyllä / Yes

Valitse / Choose Ei / No

Ei tietoa / Not known

47. Onko hevosella todettu viimeisen vuoden aikana mitään seuraavista? / Has the horse been diagnosed with any of these in the last year?

Kyllä / Yes

Laihtuminen / Loss of weight Ei / No

Ei tietoa / Not known

Kyllä / Yes

Ähky / Colic Ei / No

Ei tietoa / Not known

Ripuli / Diarrhea  
 Kyllä / Yes  
 Ei / No  
 Ei tietoa / Not known

48. Onko hevoselta löydetty ulostenäytteestä sisäloisia viimeisen vuoden aikana? Has the horse been diagnosed with parasites from a faecal sample in the last year?

Valitse / Choose  
 Kyllä / Yes  
 Ei / No  
 Ei tietoa / Not known

49. Kuinka usein hevonen on hoidettu loishäätölääkkeellä (madotettu)? / How often has the horse been dewormed?

2 kertaa vuodessa / twice a year  
 4 kertaa vuodessa / 4 times a year  
 Valitse / Choose  
 Useammin kuin 4 kertaa vuodessa / More than 4 times a year  
 Harvemmin kuin 2 kertaa vuodessa / Less than 2 times a year  
 Ei lainkaan viimeisen 2 vuoden aikana / Not dewormed at all in the last 2 years

50. Millä loishäätölääkkeellä hevosta on hoidettu? (voit valita useamman vaihtoehdon) / What deworm medication has been used (you can pick more than one)

Equest  
 Equest Pramox  
 Eraquell  
 Noromectin  
 Ivomec  
 Hippomectin  
 Equimax  
 Equimaxtabs  
 Axilur  
 Vectin vet purutabl  
 Twinhip  
 Stongid P  
 Provid  
 Joku muu / Other

50b. Jos muu, niin mikä? If other what?

51. Onko hevosella tällä hetkellä voimassa olevia rokotuksia? / Does the horse have valid vaccinations at the moment?

|                                            |                                                 |
|--------------------------------------------|-------------------------------------------------|
| Hevosinfluenssa / Horse influenza          | Kyllä / Yes<br>Ei / No<br>Ei tietoa / Not known |
| Jäykkäkouristus / Tetanus                  | Kyllä / Yes<br>Ei / No<br>Ei tietoa / Not known |
| Hevosien herpesvirus / Equine herpes virus | Kyllä / Yes<br>Ei / No<br>Ei tietoa / Not known |
| Rabies                                     | Kyllä / Yes<br>Ei / No<br>Ei tietoa / Not known |
| Botulismi / Botulism                       | Kyllä / Yes<br>Ei / No<br>Ei tietoa / Not known |

51b. Jos joku muu rokotus on tällä hetkellä voimassa, niin mikä? / If other vaccination is valid at the moment, what is it

52. Käytetäänkö hevosella jotakin näistä tulehduskipulääkkeistä? (Voit valita useamman kuin yhden) / Are any of these NSAID's used in the horse? (You can pick more than one)

Metacam  
Flunixin  
Finadyne  
Loxicom  
Comforion  
Buscopan compositum  
Equioxx  
Ketovet  
Meflosyl  
Romefen  
Quadtrisol  
Rheumocam  
Tulehduskipulääkkeitä ei ole käytetty / NSAID's have not been used

53. Kuinka usein hevosella käytetään kipulääkkeitä? / How often are the NSAID's used?

Joka viikko / Every week  
Valitse Joka kuukausi / every month  
Harvemmin kuin joka kuukausi / Less than every month  
Ei tietoa / Not known

54. Montako vuorokautta hevosta on pisimmillään yhtäjaksoisesti hoidettu tulehduskipulääkkeellä? / How many days is the longest non-stop treatment with NSAID's?

1vrk / 1 day  
3 vrk / 3 days  
Valitse / Choose 5vrk / 5 days  
7vrk / 7 days  
yli 10 vrk / Over 10 days  
Joku muu / Other

54b. Muu aika, mikä? / Other, what?

55. Käytetäänkö hevosella mahahaavan hoitoon tai ehkäisyyn jotakin ei-lääkkeellistä valmistetta? (esim. homeopaattinen valmiste) / Is some anti-ulcer non-vet medication used in the horse? (eg. homeopathic remedy)

Valitse Kyllä / Yes  
Ei / No

55b. Jos kyllä, niin mitä? / If yes, what?

**Kiitos vastauksestasi! / Thank you for your time!**

Kommentteja ja palautetta kyselystä. / Comments and feedback for the questionnaire.

**Tietojen lähetys**

© Eduix Oy
